# Supplementary material
Source: MDPI journal article supplement (https://www.mdpi.com/2076-3417/13/17/9711)
Supplement: s1 [file s1]

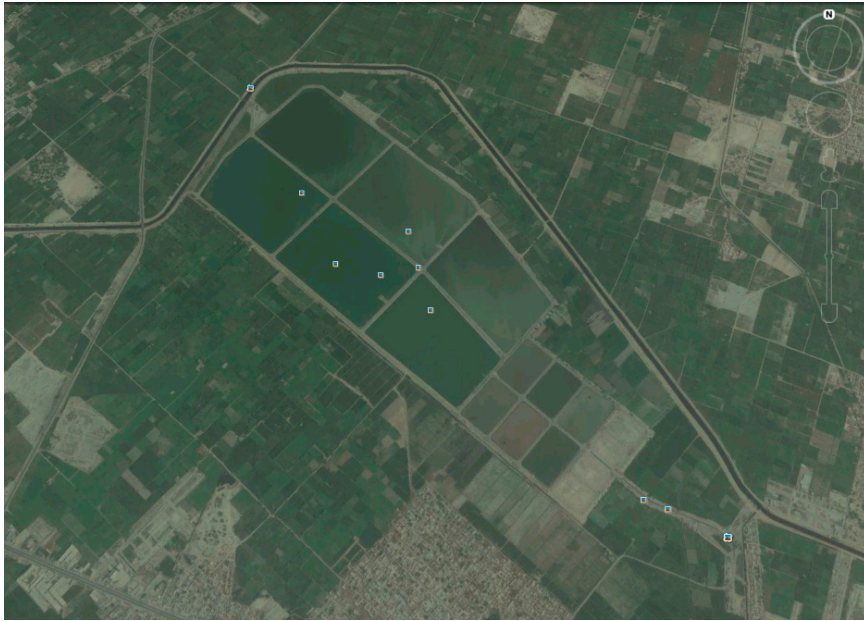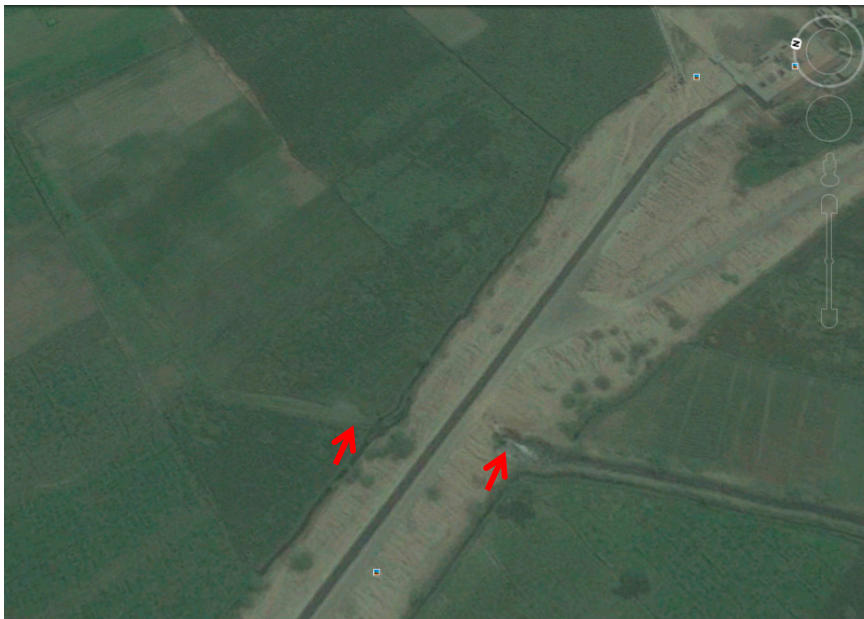

Figure S1. An overview of the Chakera wastewater treatment plant showing the wastewater being taken from the drainage canal to irrigate nearby agricultural lands. Images are taken from Google earth.
